# Supplementary material for: Trends in incidence and case fatality of acute myocardial infarction, angina and coronary revascularisation in people with and without type 2 diabetes in Scotland between 2006 and 2015
Source: Springer Nature journal article supplement (doi:10.1007/s00125-018-4796-7), 2019-01-17
Supplement: MOESM1 [file 16402732]

## Electronic Supplementary Material

### TABLES:

**ESM Table 1.** Cameron and Trivedi test for over-dispersion

| Coronary Heart Disease Type | Dispersion value | Z statistic | P-value |
|-----------------------------|------------------|-------------|---------|
| Acute myocardial infarction | 1.34             | 25.08       | <0.001  |
| Angina                      | 1.18             | 14.14       | <0.001  |
| Revascularisation           | 1.59             | 41.85       | <0.001  |

**ESM Table 2:** Interaction coefficients for negative binomial models, adjusted for age, sex, diabetes status, deprivation and calendar year

| CHD Type                     | Interaction term            | Relative risk [95% CI] | P-value |
|------------------------------|-----------------------------|------------------------|---------|
| <b>Myocardial Infarction</b> | Diabetes Type X Age         | 0.99 [0.98, 0.99]      | <0.001  |
|                              | Diabetes Type X Deprivation | 1.00 [1.00, 1.01]      | 0.26    |
|                              | Diabetes Type X Year        | 1.01 [1.00, 1.01]      | <0.01   |
|                              | Diabetes Type X Sex         | 1.29 [1.25, 1.33]      | <0.001  |
|                              | Age X Deprivation           | 1.00 [1.00, 1.00]      | <0.001  |
|                              | Age X Year                  | 1.00 [1.00, 1.00]      | <0.001  |
|                              | Age X Sex                   | 1.02 [1.02, 1.02]      | <0.001  |
|                              | Deprivation X Year          | 1.00 [1.00, 1.00]      | 0.99    |
|                              | Deprivation X Sex           | 0.98 [0.97, 0.98]      | <0.001  |
|                              | Year X Sex                  | 1.00 [1.00, 1.01]      | 0.39    |
| <b>Angina</b>                | Diabetes Type X Age         | 0.97 [0.97, 0.97]      | <0.001  |
|                              | Diabetes Type X Deprivation | 1.00 [0.99, 1.01]      | 0.43    |
|                              | Diabetes Type X Year        | 1.01 [1.00, 1.02]      | <0.01   |
|                              | Diabetes Type X Sex         | 1.15 [1.09, 1.22]      | <0.001  |
|                              | Age X Deprivation           | 1.00 [1.00, 1.00]      | <0.001  |
|                              | Age X Year                  | 1.00 [1.00, 1.00]      | 0.45    |
|                              | Age X Sex                   | 1.01 [1.00, 1.01]      | <0.001  |
|                              | Deprivation X Year          | 1.00 [1.00, 1.00]      | 0.84    |
|                              | Deprivation X Sex           | 0.97 [0.97, 0.98]      | <0.001  |
|                              | Year X Sex                  | 1.00 [0.99, 1.01]      | 0.88    |
| <b>Revascularisation</b>     | Diabetes Type X Age         | 0.96 [0.96, 0.97]      | <0.001  |
|                              | Diabetes Type X Deprivation | 1.01 [1.00, 1.02]      | <0.01   |
|                              | Diabetes Type X Year        | 1.00 [0.99, 1.01]      | 0.96    |
|                              | Diabetes Type X Sex         | 1.41 [1.34, 1.49]      | <0.001  |
|                              | Age X Deprivation           | 1.00 [1.00, 1.00]      | <0.001  |

|                    |                   |        |
|--------------------|-------------------|--------|
| Age X Year         | 1.00 [1.00, 1.00] | 0.12   |
| Age X Sex          | 1.01 [1.01, 1.01] | <0.001 |
| Deprivation X Year | 1.00 [1.00, 1.00] | 0.14   |
| Deprivation X Sex  | 0.95 [0.94, 0.96] | <0.001 |
| Year X Sex         | 1.00 [0.99, 1.01] | 0.67   |

---

**ESM Table 3.** Total number of coronary heart disease events and person-time by calendar year, sex and diabetes (events/person-time (1000s)).

| CHD Type              | Sex | Diabetes status | Overall | Total hosp person-time(10 00s) | 2006      | 2007      | 2008      | 2009      | 2010      | 2011      | 2012      | 2013      | 2014      | 2015      |
|-----------------------|-----|-----------------|---------|--------------------------------|-----------|-----------|-----------|-----------|-----------|-----------|-----------|-----------|-----------|-----------|
| Myocardial infarction | M   | No DM           | 65611   | 15579                          | 6487/1507 | 6479/1520 | 6532/1531 | 6563/1541 | 6936/1552 | 6797/1567 | 6787/1575 | 6514/1584 | 6290/1595 | 6226/1604 |
|                       | M   | T2DM            | 15093   | 1146                           | 1218/90   | 1317/96   | 1343/101  | 1488/107  | 1597/113  | 1545/117  | 1676/123  | 1614/128  | 1568/132  | 1727/136  |
|                       | F   | No DM           | 39925   | 17260                          | 4398/1693 | 4092/1702 | 4126/1707 | 4123/1713 | 4184/1719 | 4030/1728 | 4101/1735 | 3774/1743 | 3616/1753 | 3481/1762 |
|                       | F   | T2DM            | 9297    | 929                            | 875/76    | 778/80    | 847/84    | 924/88    | 948/92    | 999/95    | 955/98    | 1026/101  | 934/104   | 1011/106  |
| Angina                | M   | No DM           | 18584   | 15603                          | 2440/1509 | 2619/1522 | 2534/1533 | 2123/1543 | 1854/1555 | 1465/1570 | 1435/1578 | 1429/1587 | 1378/1597 | 1307/1606 |
|                       | M   | T2DM            | 4725    | 1152                           | 531/90    | 572/96    | 560/101   | 468/107   | 505/113   | 384/118   | 378/123   | 445/129   | 426/134   | 456/137   |
|                       | F   | No DM           | 14809   | 17273                          | 2002/1695 | 2064/1703 | 2081/1708 | 1664/1714 | 1444/1720 | 1153/1730 | 1158/1737 | 1157/1744 | 1099/1754 | 987/1763  |
|                       | F   | T2DM            | 3145    | 930                            | 361/76    | 385/80    | 397/84    | 369/88    | 319/92    | 283/95    | 236/98    | 282/102   | 250/104   | 263/106   |
| Revascularisation     | M   | No DM           | 42497   | 15591                          | 4065/1508 | 4197/1521 | 4007/1532 | 4070/1542 | 4255/1553 | 4286/1569 | 4395/1576 | 4497/1585 | 4424/1595 | 4301/1605 |
|                       | M   | T2DM            | 8382    | 1138                           | 685/90    | 763/96    | 723/101   | 783/106   | 818/112   | 828/117   | 903/121   | 912/126   | 969/131   | 998/134   |
|                       | F   | No DM           | 15770   | 17272                          | 1572/1695 | 1635/1703 | 1544/1709 | 1479/1714 | 1546/1720 | 1574/1730 | 1617/1737 | 1628/1744 | 1628/1754 | 1547/1763 |
|                       | F   | T2DM            | 3226    | 930                            | 295/76    | 268/80    | 258/84    | 337/88    | 316/92    | 338/95    | 287/98    | 361/101   | 376/104   | 390/106   |

M: Male, F: Females. No DM: No diabetes, T2DM: Type 2 diabetes

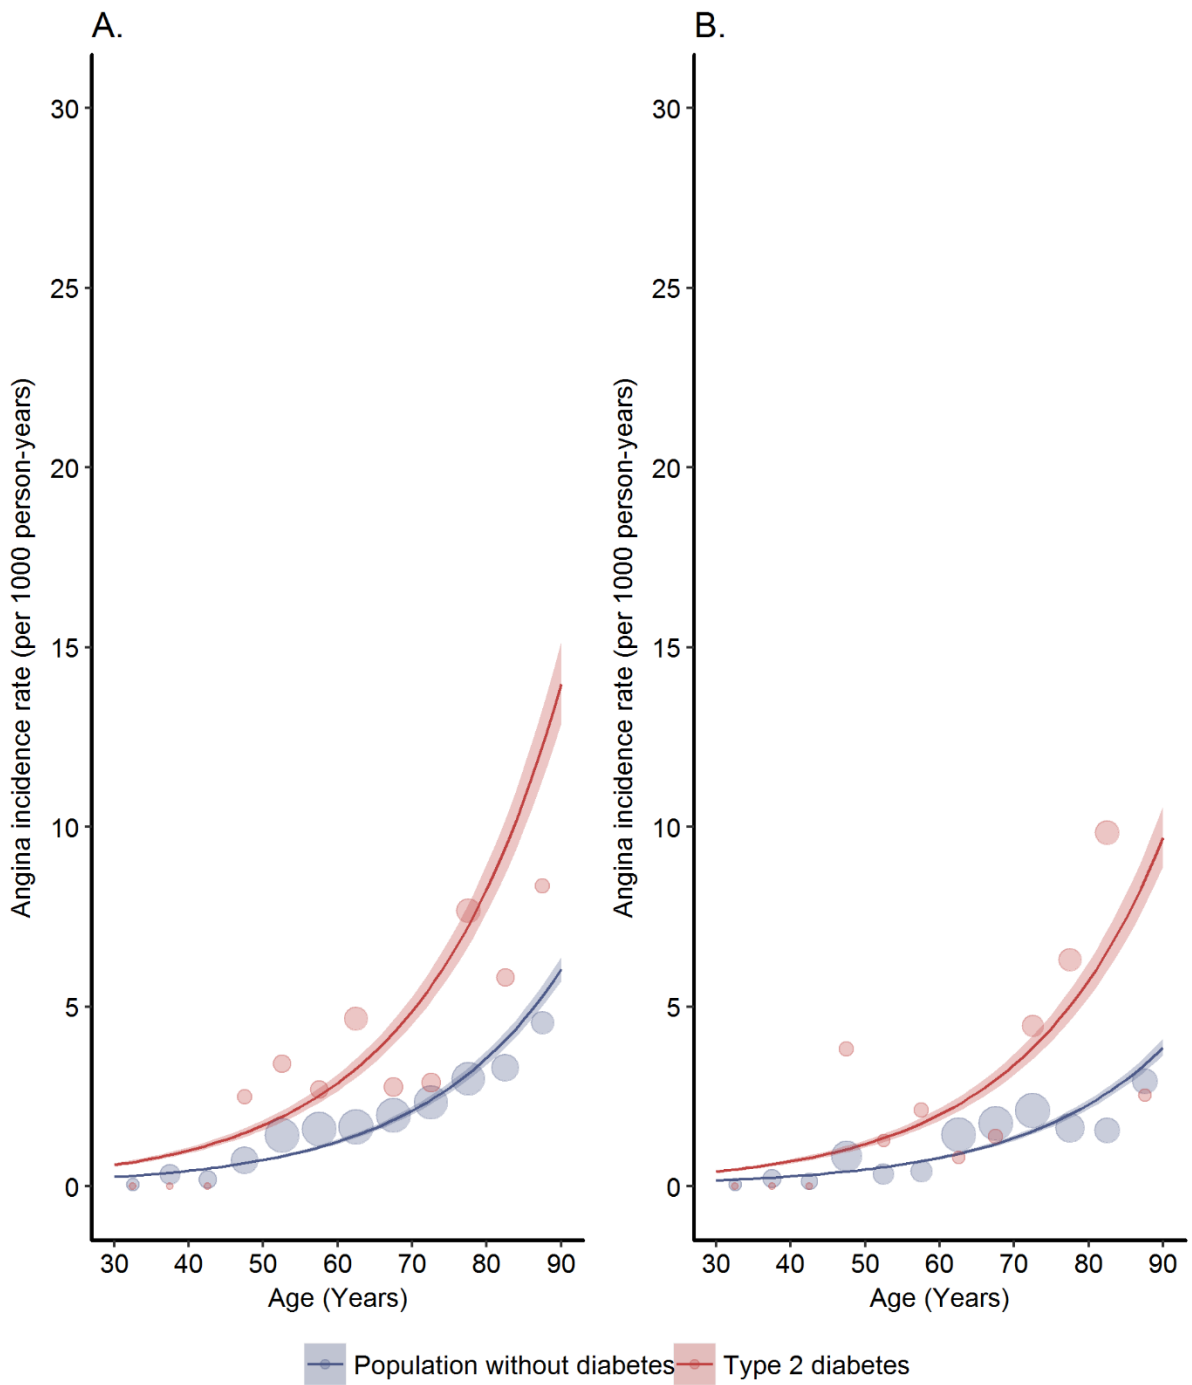

**ESM Fig. 1.** Incidence of angina by diabetes status and age for **A.** Men and **B.** Women. *Graph illustrates rates for people in deprivation decile 5 in the year 2010. Model adjusted for age, sex, diabetes status, deprivation and calendar year. The shading shows 95% CIs.*

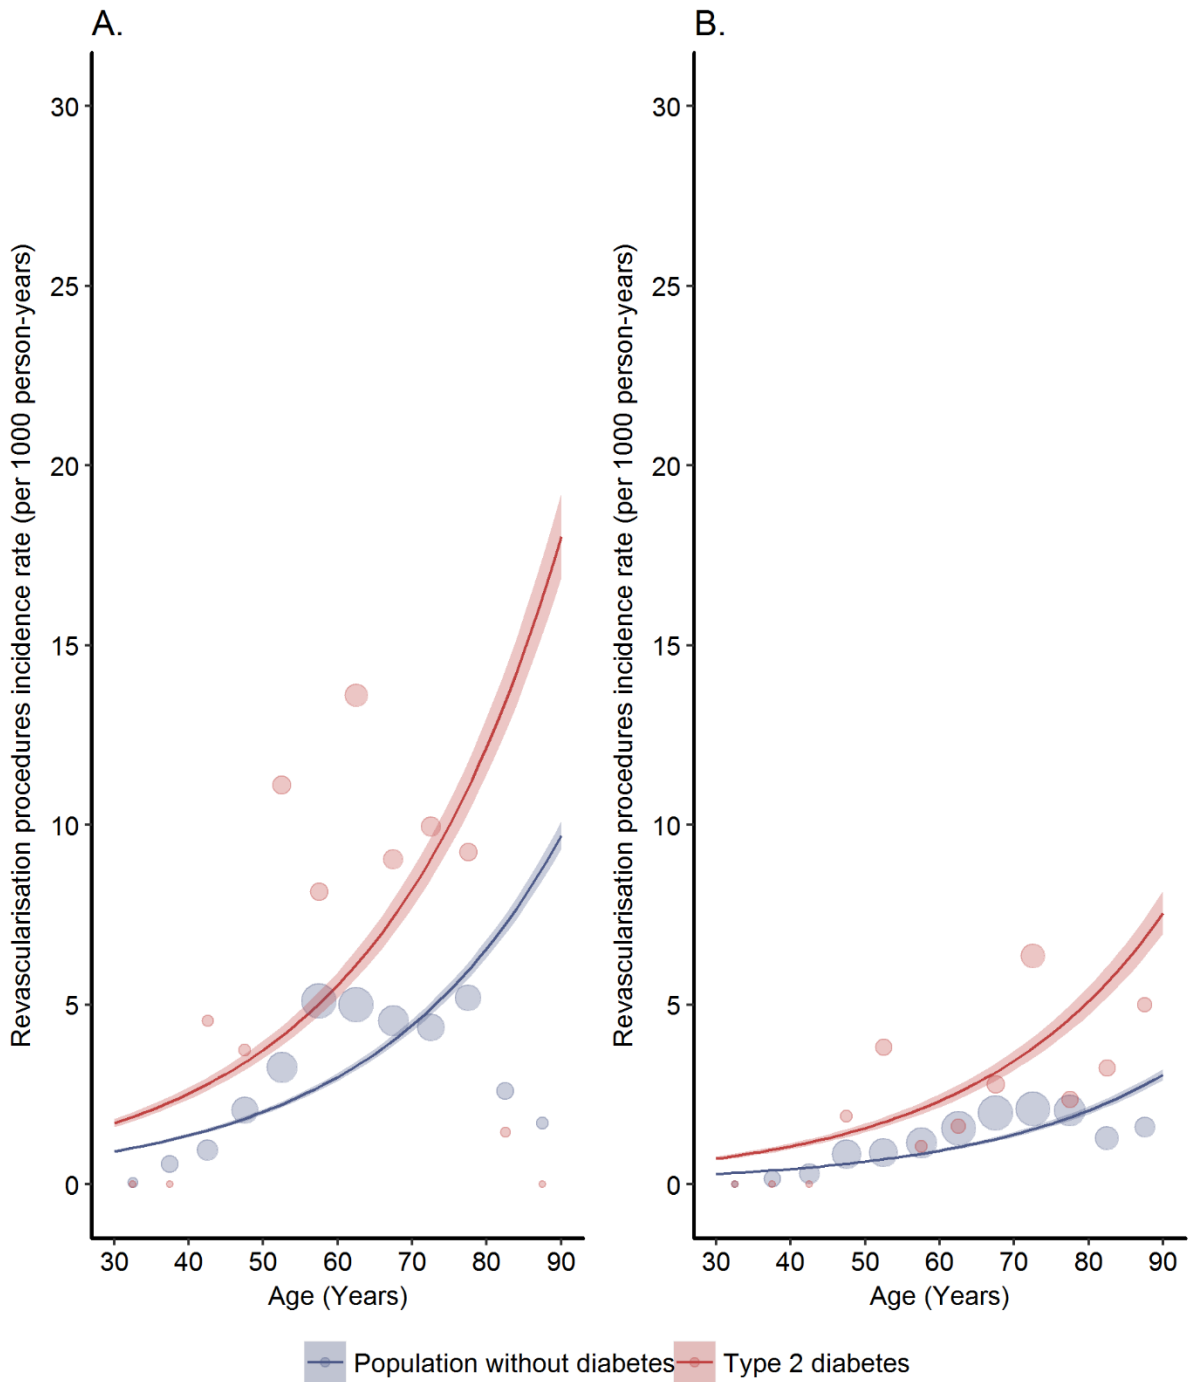

**ESM Fig. 2.** Incidence of revascularisation procedures by diabetes status and age for **A.** Men and **B.** Women. Graph illustrates rates for people in deprivation decile 5 in the year 2010. Model adjusted for age, sex, diabetes status, deprivation and calendar year. The shading shows 95% CIs.

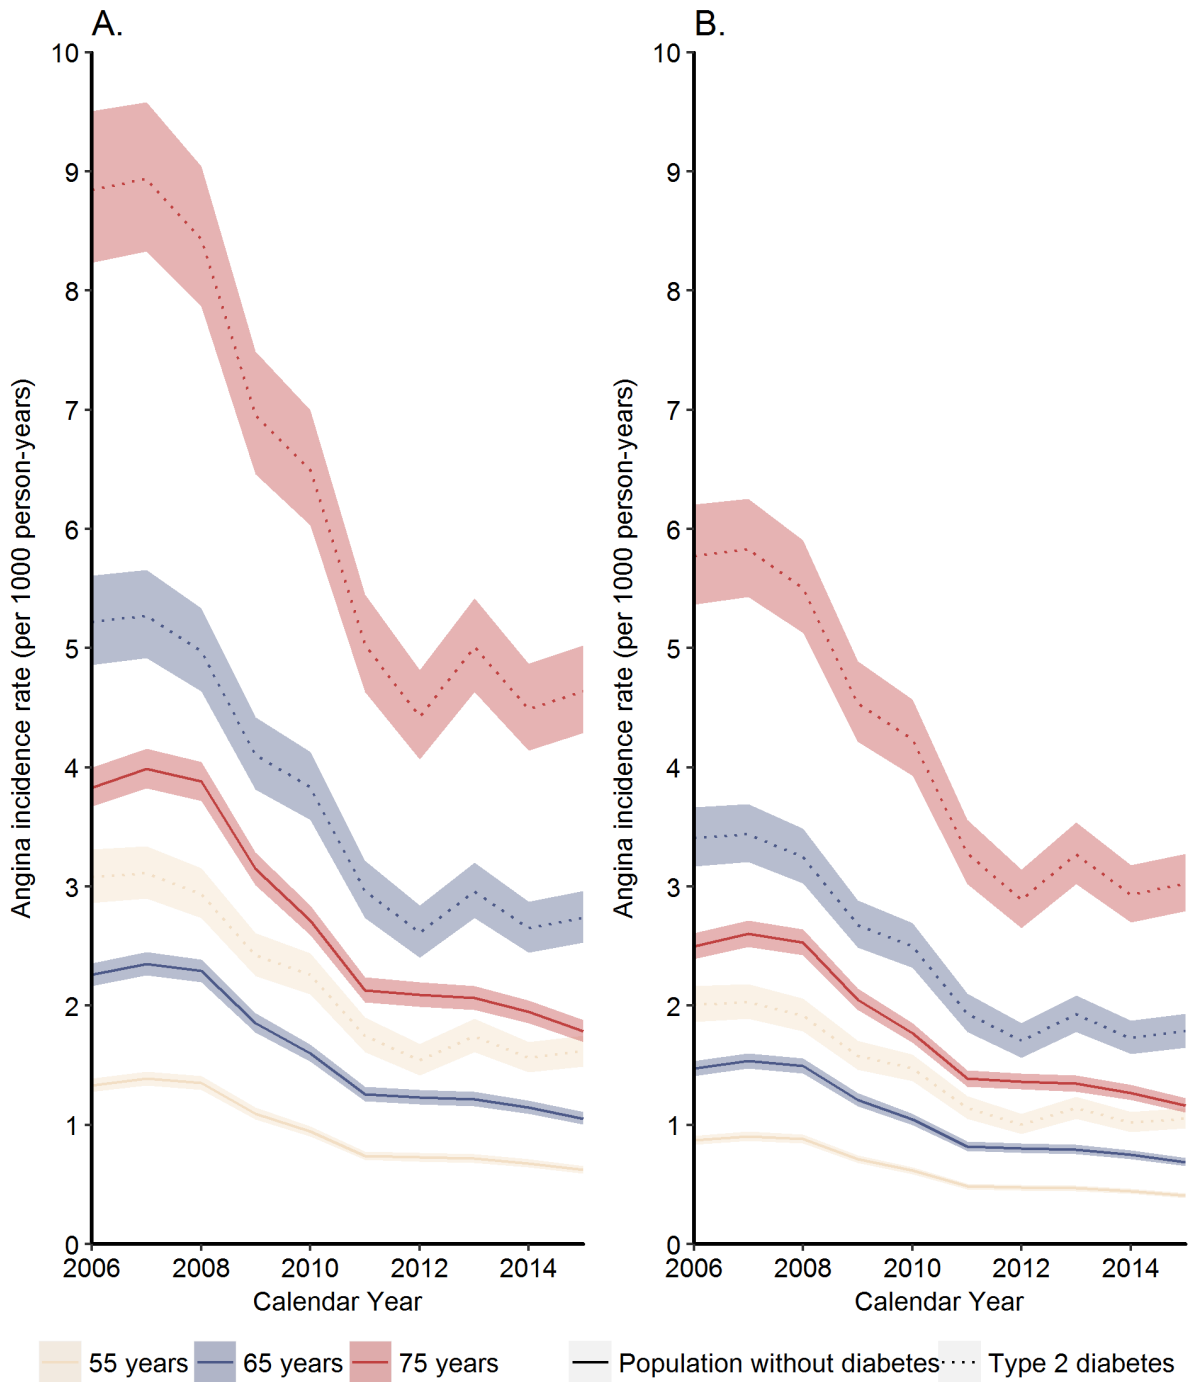

**ESM Fig. 3.** Incidence of angina by diabetes status and year for **A.** Men and **B.** Women. Graph illustrates rates for people aged 55, 65 and 75 years and in deprivation decile 5. Model adjusted for age, sex, diabetes status, deprivation, calendar year and interaction terms between sex and diabetes status, deprivation and diabetes status, diabetes status and year. The shading shows 95% CIs.

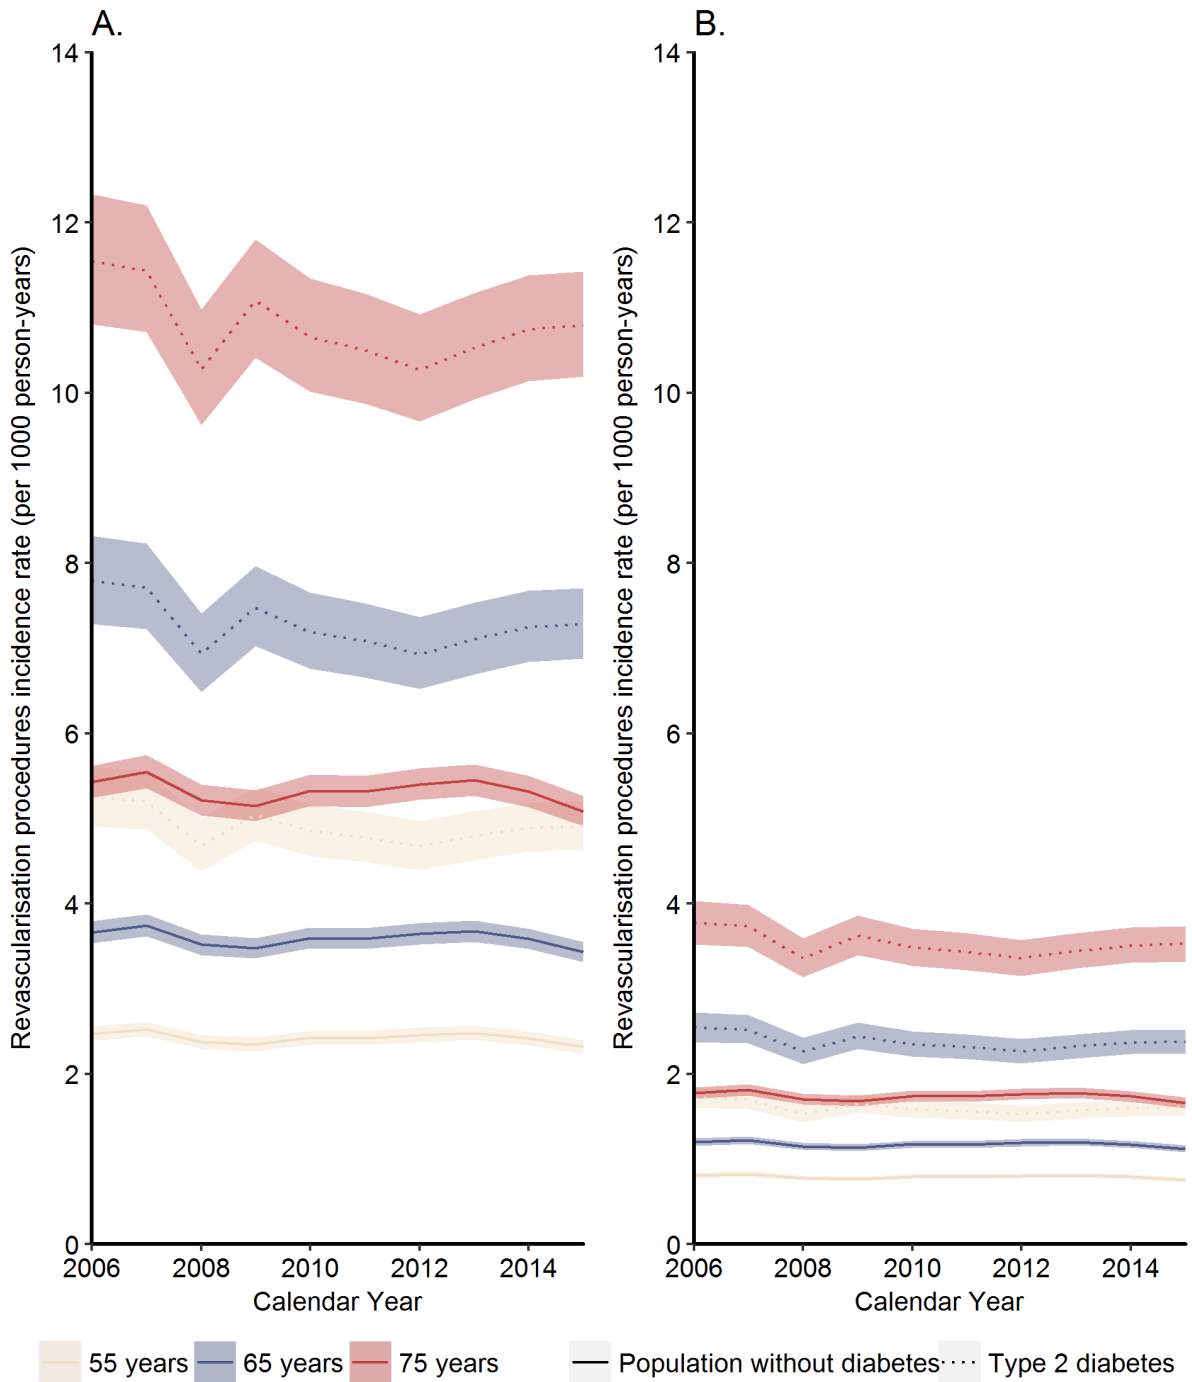

**ESM Fig. 4.** Incidence of revascularisation procedures by diabetes status, sex and year for **A.** Men and **B.** Women. *Graph illustrates rates for people aged 55, 65 and 75 years and in deprivation decile 5. Model adjusted for age, sex, diabetes status, deprivation, calendar year and interaction terms between sex and diabetes status, deprivation and diabetes status, diabetes status and year. The shading shows 95% CIs.*

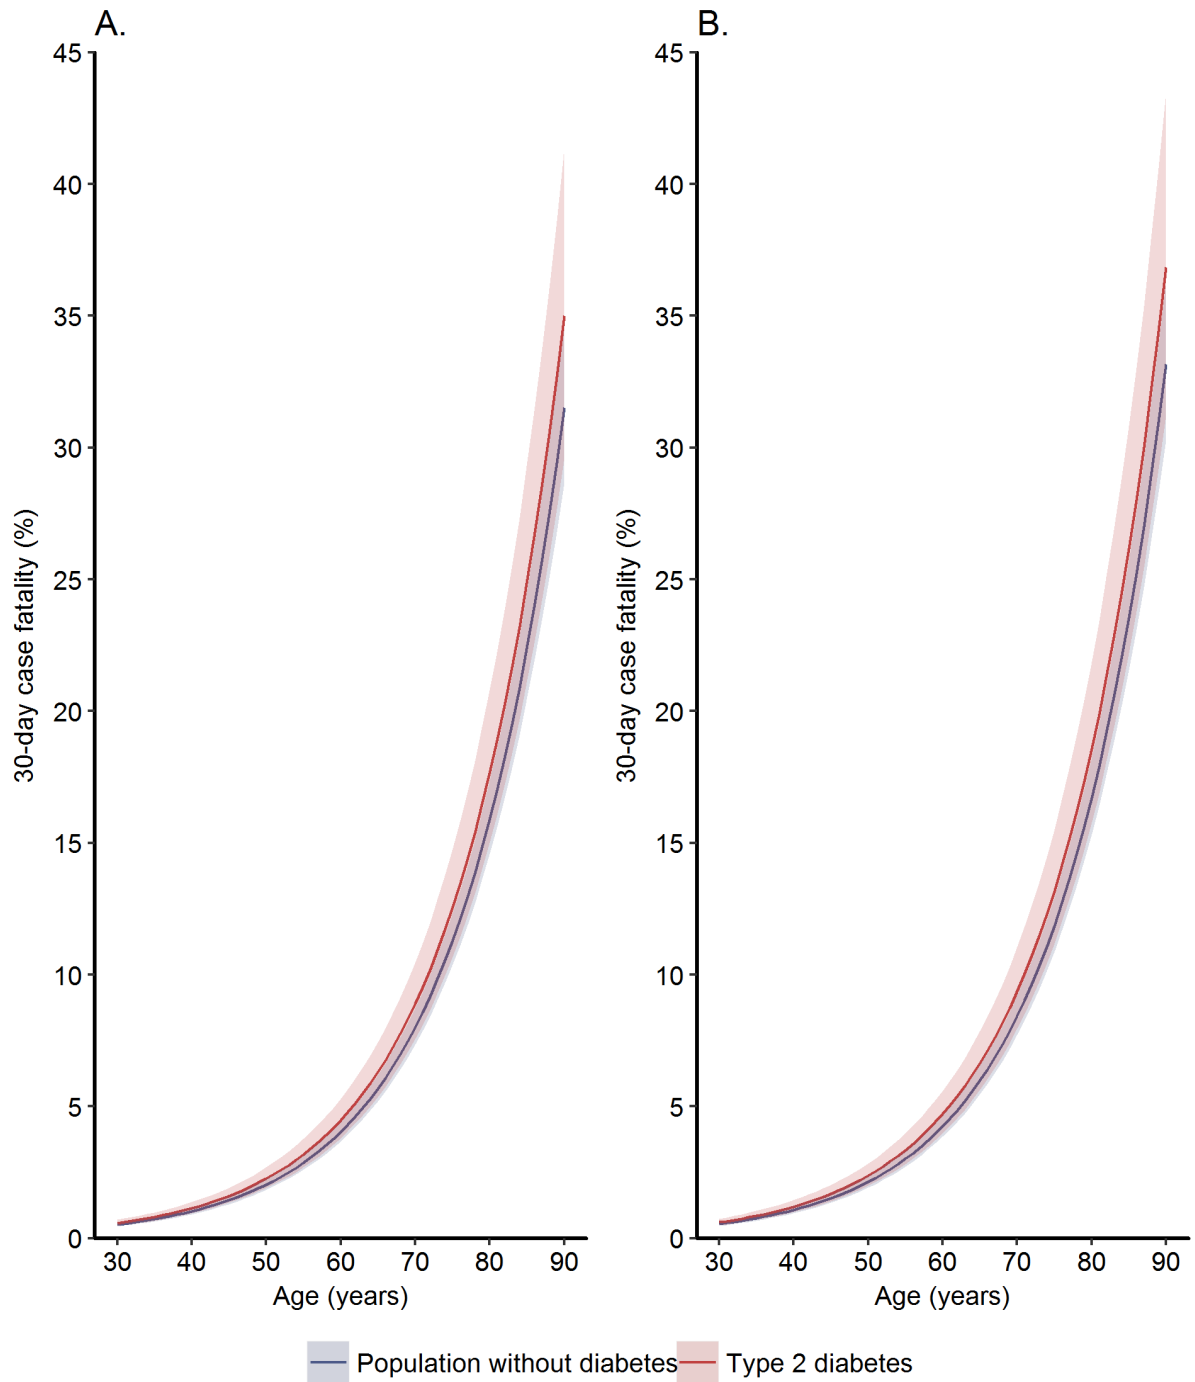

**ESM Fig. 5.** Case-fatality within 30 days of hospital admission following myocardial infarction by age, sex and diabetes status for **A.** Men and **B.** Women. Model adjusted for age, sex, diabetes status, deprivation, calendar year. The shading shows 95% CIs.
